# Supplementary material
Source: publisher site journal article supplement (https://www.spandidos-publications.com/4158/downloadSupplementary)

Figure S1. Correlation analysis between the calcium content and spectral curve slope in the stable plaque group. The calcium content was negatively correlated with the spectral curve slope ( $r=-0.494$ ,  $P=0.006$ ).

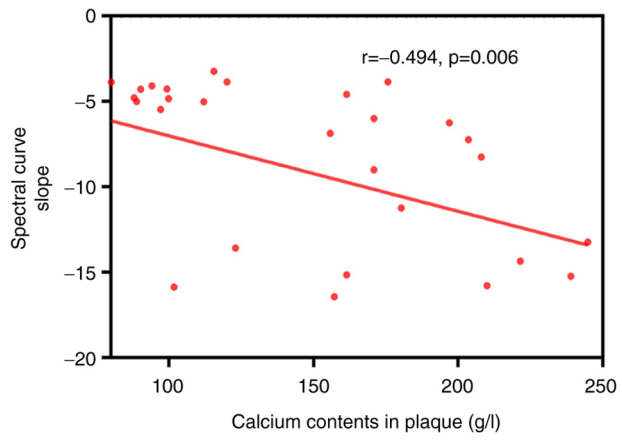

Supplement: Supplementary file 1 [file downloadSupplementary]
